# Supplementary material for: Ancient DNA Analysis of 8000 B.C. Near Eastern Farmers Supports an Early Neolithic Pioneer Maritime Colonization of Mainland Europe through Cyprus and the Aegean Islands
Source: PLoS Genet. 2014 Jun 5;10(6):e1004401. doi: 10.1371/journal.pgen.1004401 (PMC4046922; doi:10.1371/journal.pgen.1004401)
Supplement: Table S1 — Real time PCR quantification results of extracted ancient DNA. Rn: Normalized Reporter; Ct: Threshold cycle. SD: Standard Deviation; CV: Coefficient of Variation. (DOCX) [file pgen.1004401.s004.docx]

| Skeleton/  Sample | Rn | Ct | Estimated copy number | Average copy number | SD | CV (%) | Copies/µl | pg target mtDNA/µl |
| --- | --- | --- | --- | --- | --- | --- | --- | --- |
| H3/1 | 8.15x103 | 36.33 | 2.02x105 | 1.85x105 | 2.46x104 | 13.31 | 3.7x104 | 4.05x10-5 |
| 7.54x103 | 36.6 | 1.68x105 |
| H3/2 | 8.54x103 | 36.2 | 7.38x104 | 1.35x105 | 8.68x104 | 64.22 | 2.7x104 | 2.96x10-5 |
| 1.17x104 | 35.02 | 1.97x105 |
| H4/1 | 8.59x103 | 36.18 | 2.25x105 | 3.22x105 | 1.37x105 | 42.63 | 6.43x104 | 7.05x10-5 |
| 1.07x104 | 35.29 | 4.19x105 |
| H4/2 | 1.04x104 | 35.12 | 1.81x105 | 1.67x105 | 1.95x104 | 11.63 | 3.35x104 | 3.67x10-5 |
| 9.57x103 | 35.32 | 1.54x105 |
| H7/1 | 7.9x103 | 36.62 | 5.17x104 | 5.73x104 | 7.88x103 | 13.75 | 1.15x104 | 1.26x10-5 |
| 8.27x103 | 36.39 | 6.29x104 |
| H7/2 | 7.21x103 | 36.71 | 4.8x104 | 5.47x104 | 9.44x103 | 17.27 | 1.09x104 | 1.2x10-5 |
| 7.89x103 | 36.42 | 6.14x104 |
| H8/1 | 4.2x103 | 38.05 | 6.08x104 | 7.2x104 | 1.59x104 | 22.07 | 1.44x104 | 1.58x10-5 |
| 4.83x103 | 37.6 | 8.33x104 |
| H8/2 | 6.43x103 | 36.68 | 4.21x104 | 4.16x104 | 6.24x102 | 1.50 | 8.32x103 | 9.12x10-5 |
| 6.51x103 | 36.65 | 4.12x104 |
| H66/1 | 5.8x103 | 37.32 | 1.01x105 | 1.14x105 | 1.73x104 | 15.27 | 2.27x104 | 2.49 x10-5 |
| 6.74x103 | 37.01 | 1.26x105 |
| H66/2 | 9.92x103 | 35.45 | 8.53x104 | 9.87x104 | 1.89x104 | 19.17 | 1.97x104 | 2.16 x10-5 |
| 9.46x103 | 35.79 | 1.12x105 |
| H65/1 | 9.67x103 | 35.92 | 2.69x105 | 2.39x105 | 4.34x104 | 18.19 | 4.78x104 | 5.23x10-5 |
| 8.29x103 | 36.29 | 2.08x105 |
| H70/1 | 1.12x104 | 35.05 | 1.47x105 | 1.51x105 | 6.19x103 | 4.10 | 3.02x104 | 3.31x10-5 |
| 1.12x104 | 35.12 | 1.55x105 |
| H70/2 | 8.19x103 | 36.24 | 5.56x104 | 5.72x104 | 2.3x103 | 4.02 | 1.14x104 | 1.25x10-5 |
| 7.8x103 | 36.31 | 5.88x104 |
| H68/1 | 6.72x103 | 37.12 | 3.4x104 | 2.61x104 | 1.13x104 | 43.26 | 5.21x103 | 5.71x10-6 |
| 4.81x103 | 37.88 | 1.81x104 |
| H64/1 | 8.36x103 | 36.12 | 8.65x104 | 7.57x104 | 1.53x104 | 20.28 | 1.51x104 | 1.66x10-5 |
| 9.11x103 | 35.77 | 6.48x104 |
| H54/1 | 8.75x103 | 35.98 | 7.97x104 | 7.63x104 | 4.81x103 | 6.30 | 1.53x104 | 1.67x10-5 |
| 8.76x103 | 35.87 | 7.29x104 |
| H49/1 | 6.38x103 | 36.75 | 1.04x105 | 7.14x104 | 4.62x104 | 64.66 | 1.43x104 | 1.57x10-5 |
| 9.24x103 | 35.54 | 3.88x104 |
| H56/1 | 5.63x103 | 37.49 | 8.99x104 | 7.71x104 | 1.81x104 | 23.51 | 1.54x104 | 1.69x10-5 |
| 4.6x103 | 37.97 | 6.43x104 |
| H45/1 | 8.97x103 | 36.17 | 7.55x104 | 6.71x104 | 1.19x104 | 17.70 | 1.34x104 | 1.47x10-5 |
| 8.06x103 | 36.47 | 5.87x104 |
| H47/1 | 1.02x104 | 35.53 | 6.68x104 | 8.61x104 | 2.74x104 | 31.78 | 1.72x104 | 1.89x10-5 |
| 8.5x103 | 36.09 | 1.05x105 |
| H37/1 | 8.24x103 | 36.47 | 5.86x104 | 6.8x104 | 1.33x104 | 19.50 | 1.36x104 | 1.49x10-5 |
| 9.43x103 | 36.14 | 7.73x104 |
| H57/1 | 8.17x103 | 36.16 | 2.52x104 | 4.39x104 | 2.65x104 | 60.28 | 8.78x103 | 9.63x10-6 |
| 5.04x103 | 37.28 | 6.26x104 |
| R65-7I/1 | 7.67x103 | 36.58 | 1.7x105 | 1.4x105 | 4.28x104 | 30.65 | 2.79x104 | 3.06x10-5 |
| 6.17x103 | 37.21 | 1.09x105 |
| R63-1/1 | 8.01x103 | 36.51 | 1.78x105 | 2.35x105 | 7.96x104 | 33.93 | 4.69x104 | 5.14x10-5 |
| 9.17x103 | 35.81 | 2.91x105 |
| R65(8)/1 | 4.85x103 | 37.64 | 8.1x104 | 8.54x104 | 6.33x103 | 7.41 | 1.71x104 | 1.87x10-5 |
| 5.26x103 | 37.49 | 8.99x104 |
| R65(8)/2 | 7.79x103 | 36.5 | 1.8x105 | 1.53x105 | 3.81x104 | 24.95 | 3.05x104 | 3.35x10-5 |
| 6.65x103 | 37.01 | 1.26x105 |
| R65-10/1 | 6.03x103 | 37.24 | 1.07x105 | 1.2x105 | 1.77x104 | 14.78 | 2.39x104 | 2.62x10-5 |
| 6.66x103 | 36.94 | 1.32x105 |
| R65-10/2 | 8.85x103 | 36.13 | 2.33x105 | 2.27x105 | 7.86x103 | 3.46 | 4.54x104 | 4.98x10-5 |
| 8.67x103 | 36.2 | 2.22x105 |
| R65-1/1 | 1.01x104 | 35.5 | 2.02x104 | 6.39x104 | 6.19x104 | 96.78 | 1.28x104 | 1.4x10-5 |
| 4.25x103 | 37.55 | 1.08x105 |
| R65-3 I/1 | 9.16x103 | 35.96 | 6.72x104 | 7.06x104 | 4.8x103 | 6.80 | 1.41x104 | 1.55x10-5 |
| 8.43x103 | 36.08 | 7.4x104 |
| R65-4II/1 | 7.69x103 | 36.53 | 5.57x104 | 4.42x104 | 1.63x104 | 36.83 | 8.84x103 | 9.69x10-6 |
| 5.89x103 | 37.17 | 3.27x104 |
| R65-4II/2 | -3.59x102 | 40 | No results |  |  |  |  |  |
| -3.47x102 | 40 | No results |
| R65-4II/3 | 7.39x103 | 36.95 | 3.95x104 | 5.83x104 | 2.66x104 | 45.67 | 1.17x104 | 1.28x10-5 |
| 9.2x103 | 36.14 | 7.71x104 |
| R65-14/1 | 1.24x103 | 39.91 | 3.33x103 | 1.38x104 | 1.49x104 | 107.38 | 2.77x103 | 3.03x10-6 |
| 4.32x103 | 37.52 | 2.43x104 |
| R65-C8-SEA/1 | -2.2x102 | 40 | No results |  |  |  |  |  |
| -2.04x102 | 40 | No results |
| R69(2)/1 | 1.12x104 | 35.01 | 6.42x104 | 1.13x105 | 6.89x104 | 61.02 | 2.26x104 | 2.47x10-5 |
| 7.34x103 | 36.13 | 1.62x105 |
| R69(2)/2 | 9.78x103 | 35.92 | 2.69x105 | 2.47x105 | 3.17x104 | 12.82 | 4.94x104 | 5.42x10-5 |
| 8.74x103 | 36.18 | 2.25x105 |
| R65-C8-SEB/1 | 9.65x103 | 35.67 | 1.14x105 | 1.39x105 | 3.51x104 | 25.27 | 2.78x104 | 3.05x10-5 |
| 1.08x104 | 35.24 | 1.64x105 |
| R65-1S/1 | 5.9x103 | 29.68 | 1.04x107 | 2.03x107 | 1.39x107 | 68.72 | 4.05x106 | 4.44x10-3 |
| 1.81x104 | 28.31 | 3.01x107 |
| R66-N4-Nº400/1 | 8.36x103 | 36.3 | 6.77x104 | 7.93x104 | 1.64x104 | 20.63 | 1.59x104 | 1.74x10-5 |
| 9.35x103 | 35.95 | 9.08x104 |
| SK-A2/1 | 8.45x103 | 36.14 | 6.86x104 | 6.62x104 | 3.41x103 | 5.15 | 1.32x104 | 1.45x10-5 |
| 8.34x103 | 36.05 | 6.38x104 |
| SK-D4 16/1 | 7.86x103 | 36.25 | 3.71x104 | 4.77x104 | 1.49x104 | 31.30 | 9.53x103 | 1.04x10-5 |
| 6.23x103 | 36.8 | 5.82x104 |
| SK-N4/1 | 4.84x103 | 37.35 | 2.55x104 | 2.46x104 | 1.2x103 | 4.89 | 4.92x103 | 5.39x10-6 |
| 5.03x103 | 37.26 | 2.38x104 |
| SK-R3/1 | 6.53x103 | 36.8 | 3.07x104 | 3.4x104 | 4.62x103 | 13.58 | 6.8x103 | 7.45x10-6 |
| 5.8x103 | 37.03 | 3.73x104 |
| SK-R3/2 | 4.92x103 | 37.41 | 4.95x104 | 3.6x104 | 1.9x104 | 52.76 | 7.21x103 | 7.9x10-6 |
