# Supplementary material for: Ancient DNA Analysis of 8000 B.C. Near Eastern Farmers Supports an Early Neolithic Pioneer Maritime Colonization of Mainland Europe through Cyprus and the Aegean Islands
Source: PLoS Genet. 2014 Jun 5;10(6):e1004401. doi: 10.1371/journal.pgen.1004401 (PMC4046922; doi:10.1371/journal.pgen.1004401)
Supplement: Table S8 — Details of the PCA-HCA performed over haplogroup frequencies of the PPNB sample and the other populations of the database. Population labels are described in Table S4. (XLSX) [file pgen.1004401.s011.xlsx]

## Sheet: PCA-Sheet 1
SUMMARY STATISTICS OF CONTINUOUS VARIABLES
Label variable	Count	Mean	Standard Deviation	Minimum	Maximum
H	62	21.639	14.687	0	50
HV	62	6.464	8.252	0	36.364
I	62	1.67	1.619	0	5.882
J	62	8.795	5.567	0	29.546
K	62	6.945	7.793	0	42.857
T	62	8.808	5.861	0	30
U*	62	0.902	2.443	0	15.033
U1	62	2.205	2.567	0	10
U2	62	1.697	2.517	0	10.112
U3	62	2.486	3.616	0	17.647
U4	62	2.082	2.491	0	11.111
U5	62	3.243	3.519	0	11.26
U6	62	0.327	0.72	0	2.963
U7	62	1.134	2.034	0	10.811
U+	62	0.334	0.744	0	3.371
HV0	62	1.732	2.536	0	13.333
W	62	2.237	2.511	0	10
X	62	2.494	3.615	0	15.922
AF	62	5.629	12.368	0	69.259
N1	62	2.718	3.37	0	15.556
N2	62	0.045	0.198	0	1.37
N*	62	0.966	4.107	0	30.769
R0	62	3.64	4.685	0	21.429
R+	62	0.752	1.855	0	10
AS	62	11.055	20.563	0	93.75

## Sheet: PCA-Sheet 2
COVARIANCE MATRIX
	H	HV	I	J	K	T	U*	U1	U2	U3	U4	U5	U6	U7	U+	HV0	W	X	AF	N1	N2	N*	R0	R+	AS
H	215.71
HV	-60.4	68.1
I	0.5	-0.43	2.62
J	-0.78	12.32	1.47	30.99
K	11.06	-16.95	-0.97	-9.17	60.73
T	7.61	2.92	1.09	5.27	-4.73	34.35
U*	4.62	-1.18	-0.33	0.12	3.21	-0.69	5.97
U1	-7.82	8.17	-0.97	1.18	-3.61	2.41	-0.52	6.59
U2	-8.57	0.74	0.9	1.25	-2.96	-4.47	-0.63	-0.53	6.33
U3	-0.09	-1.09	0.12	-0.49	-0.23	6.5	-0.11	2.97	-1.38	13.08
U4	9.56	-2.06	0.88	-2.87	-0.74	3.81	-0.84	-0.25	0.22	2.31	6.21
U5	32.78	-7.63	0.01	-3.91	1.15	0.84	-0.94	-1.86	-0.32	-1.73	2.35	12.38
U6	-1.4	-1.13	0.02	0.01	0.33	-0.1	-0.1	0.06	-0.1	0.06	-0.2	-0.48	0.52
U7	-5.52	4.64	-0.16	3.2	-0.66	0.22	-0.44	0.61	-0.05	1.3	-0.64	-1.42	0.07	4.14
U+	0.48	-0.36	-0.1	0.85	0.47	-0.06	-0.16	-0.15	-0.14	0.04	-0.23	0.16	0	0.42	0.55
HV0	19.95	-4.35	0.06	-1.14	-0.46	0.44	0.02	-1.19	0.15	-2.22	0.55	3.65	0.01	-1.26	0.16	6.43
W	4.65	-4.49	1.01	1.02	1.52	2.76	-0.63	-1.26	0.43	-0.82	0.24	3.26	-0.1	0.15	0.22	1.06	6.3
X	16.24	-9.22	0.5	0.52	2.13	-1.55	0.36	1.2	-0.94	-1.55	-0.72	-0.78	0.09	-1.14	-0.02	0.47	-1.58	13.07
AF	-53.08	-19.61	1.96	-0.96	-7.33	-17.23	-1.21	-4.86	1.74	-0.01	-3.29	-14.48	4.57	-1.15	0.15	-8.33	-5.47	-4.9	152.97
N1	-1.57	-4.34	-0.2	4.84	3.71	5.42	-0.95	0.32	-0.99	-0.39	0.36	-2.97	0.1	-0.78	0.11	-0.54	0.5	0.56	9.08	11.36
N2	0.11	-0.03	0.03	0.06	0	-0.08	-0.02	0	-0.03	0.08	-0.03	-0.04	0	0.13	0.03	0.04	-0.03	0.11	-0.04	-0.02	0.04
N*	2.01	-4.15	-1.34	-4.55	12.28	-6.39	0.32	-1.65	0.05	-1.41	-1.66	1.32	-0.25	-0.57	-0.27	-1.31	-1.28	1.91	-1.96	-1.61	0	16.86
R0	-18.97	-5.83	-2.02	2.39	7.79	-7	2	-0.04	0.27	1.12	-2.39	-6.56	0.93	0.89	0.27	-3.75	-3.53	-0.8	21.13	0.38	-0.01	1.25	21.95
R+	-1.11	-1.44	0.42	2.35	-0.9	1.53	-0.26	0.35	0.26	2.21	-0.59	-0.29	0.03	0.04	-0.09	-1.02	1.4	-0.63	0.17	0.39	0.01	-0.09	-0.53	3.44
AS	-165.97	47.81	-5.06	-43.96	-55.66	-32.84	-7.61	0.84	8.77	-18.28	-9.96	-14.51	-2.93	-2.02	-2.35	-7.42	-5.32	-13.34	-47.87	-22.76	-0.31	-7.53	-8.94	-5.64	422.84

## Sheet: PCA-Sheet 3
CONTROL PANEL OF EIGENVALUES
Trace of matrix: 1123.52002
Number	Eigenvalue	Percentage	Cumulated Percentage
1	542.871	48.3188	48.3188
2	222.268	19.7832	68.102
3	112.936	10.052	78.154
4	74.5991	6.63977	84.7938
5	37.5921	3.34592	88.1397
6	27.6231	2.45862	90.5983
7	18.8828	1.68069	92.279
8	15.1196	1.34573	93.6247
9	14.4348	1.28478	94.9095
10	11.1334	0.990935	95.9005
11	8.03732	0.715369	96.6158
12	7.72185	0.68729	97.3031
13	6.05578	0.539	97.8421
14	5.39441	0.480134	98.3223
15	4.28114	0.381047	98.7033
16	3.48908	0.310549	99.0138
17	2.89696	0.257847	99.2717
18	2.68196	0.238711	99.5104
19	2.0711	0.18434	99.6947
20	1.47927	0.131664	99.8264
21	1.21429	0.108079	99.9345
22	0.426491	0.0379603	99.9725
23	0.280447	0.0249615	99.9974
24	0.0293422	0.00261163	100
25	0	0	100

## Sheet: PCA-Sheet 4
LOADINGS OF ACTIVE VARIABLES							ACTIVE VARIABLES-FACTORS CORRELATIONS
Label variable	Axis 1	Axis 2	Axis 3	Axis 4	Axis 5		Label variable	Axis 1	Axis 2	Axis 3	Axis 4	Axis 5
H	10.9329	-8.44295	-4.21299	2.05324	1.20153		H	0.744392	-0.57486	-0.286853	0.1398	0.0818094
HV	-3.54312	0.699975	5.997	1.88808	3.00208		HV	-0.42936	0.0848241	0.726725	0.2288	0.363796
I	0.205189	0.152302	0.0742096	0.279023	-0.181225		I	0.126762	0.0940895	0.0458455	0.172376	-0.111958
J	1.55766	1.09422	2.98853	2.02741	1.05576		J	0.279799	0.196552	0.536822	0.364179	0.189644
K	2.63709	0.398906	0.347284	-7.08452	0.301718		K	0.338386	0.0511869	0.0445629	-0.909073	0.0387159
T	1.40647	-0.613117	2.71994	1.25975	-4.38816		T	0.239982	-0.104614	0.464094	0.214947	-0.748737
U*	0.391382	-0.0603196	0.0200061	-0.351214	0.316473		U*	0.160225	-0.0246938	0.00819014	-0.143781	0.129558
U1	-0.263034	0.0929212	1.11402	0.340817	-0.108034		U1	-0.102485	0.0362045	0.434052	0.132791	-0.0420927
U2	-0.528121	0.262636	-0.0741966	0.0972402	0.434987		U2	-0.209849	0.104359	-0.0294821	0.0386385	0.172843
U3	0.695809	0.398808	0.770542	0.0981159	-1.40146		U3	0.192428	0.110292	0.213096	0.0271342	-0.387576
U4	0.575525	-0.414712	-0.00178522	0.289248	-0.676663		U4	0.231022	-0.16647	-0.000716606	0.116107	-0.27162
U5	1.24131	-1.93576	-0.7244	0.227529	0.220775		U5	0.352789	-0.550157	-0.205879	0.0646653	0.0627457
U6	0.0945866	0.34547	-0.13931	0.00547176	-0.0624606		U6	0.131461	0.48015	-0.193619	0.00760491	-0.0868108
U7	-0.071505	0.257848	0.708531	0.0836053	0.224476		U7	-0.0351523	0.12676	0.348319	0.0411009	0.110354
U+	0.103215	0.0401116	0.0457499	-0.0175822	0.0250428		U+	0.138758	0.0539244	0.0615042	-0.0236367	0.0336665
HV0	0.696108	-1.15827	-0.462596	0.352974	0.185881		HV0	0.274476	-0.456705	-0.182402	0.139178	0.0732931
W	0.334954	-0.428886	0.0903269	-0.100133	-0.723608		W	0.133406	-0.170817	0.0359755	-0.0398813	-0.2882
X	0.893414	-0.655757	-0.569965	-0.2441	0.169232		X	0.247169	-0.18142	-0.157685	-0.0675321	0.0468191
AF	0.949625	10.8421	-5.32427	2.02197	0.392862		AF	0.0767806	0.876623	-0.430487	0.163483	0.0317644
N1	0.9017	1.02653	0.378884	-0.07117	-1.11744		N1	0.267587	0.304632	0.112437	-0.0211203	-0.33161
N2	0.0139612	0.000605966	0.00583256	0.00164329	0.0115118		N2	0.0704826	0.00305921	0.0294455	0.00829609	0.058117
N*	0.379042	-0.0281868	-0.326916	-2.02819	1.17948		N*	0.0922988	-0.00686364	-0.0796058	-0.493876	0.287209
R0	0.0243989	2.27032	-0.444518	-1.41693	0.4906		R0	0.00520742	0.484552	-0.0948728	-0.302414	0.104708
R+	0.201067	0.172905	0.255623	0.117914	-0.41812		R+	0.108419	0.0932335	0.137837	0.0635816	-0.225458
AS	-19.8296	-4.31817	-3.23579	0.169676	-0.135046		AS	-0.964326	-0.209995	-0.157358	0.00825144	-0.00656738
NORMED EIGENVECTORS
Label variable	Axis 1	Axis 2	Axis 3	Axis 4	Axis 5
H	0.469229	-0.566312	-0.396437	0.237724	0.195969
HV	-0.152068	0.0469509	0.564309	0.218601	0.489636
I	0.00880654	0.0102156	0.00698302	0.0323053	-0.0295577
J	0.0668537	0.0733949	0.281217	0.234734	0.172194
K	0.113182	0.0267566	0.0326789	-0.820245	0.0492099
T	0.0603647	-0.0411249	0.255942	0.145854	-0.715705
U*	0.0167978	-0.00404594	0.00188255	-0.0406636	0.0516164
U1	-0.0112892	0.0062327	0.104828	0.0394598	-0.0176202
U2	-0.0226665	0.0176164	-0.0069818	0.0112585	0.070946
U3	0.0298636	0.0267501	0.0725069	0.0113598	-0.228576
U4	0.0247011	-0.0278169	-0.000167987	0.0334891	-0.110363
U5	0.0532761	-0.129842	-0.068165	0.0263433	0.0360082
U6	0.00405958	0.0231724	-0.0131088	0.00063352	-0.0101873
U7	-0.00306894	0.0172952	0.0666718	0.00967981	0.0366118
U+	0.00442992	0.00269049	0.004305	-0.00203566	0.00408446
HV0	0.0298764	-0.0776909	-0.0435297	0.0408673	0.0303171
W	0.014376	-0.0287676	0.00849963	-0.0115934	-0.11802
X	0.0383446	-0.043985	-0.0536329	-0.0282619	0.0276016
AF	0.0407571	0.727235	-0.501007	0.234103	0.0640755
N1	0.0387002	0.0688548	0.0356524	-0.00824006	-0.182254
N2	0.000599202	4.06453e-05	0.000548836	0.00019026	0.00187756
N*	0.0162682	-0.00189063	-0.0307623	-0.234824	0.192372
R0	0.00104718	0.152282	-0.0418285	-0.164052	0.0800164
R+	0.00862962	0.0115976	0.0240537	0.0136521	-0.0681951
AS	-0.85107	-0.289642	-0.304483	0.019645	-0.0220259

## Sheet: PCA-Sheet 5
FACTOR SCORES OF ACTIVE CASES									CONTRIBUTIONS OF ACTIVE CASES
Identifier	Relative Weight	Distance to origin	Axis 1	Axis 2	Axis 3	Axis 4	Axis 5		Identifier	Relative Weight	Distance to origin	Axis 1	Axis 2	Axis 3	Axis 4	Axis 5
ADJ	1.6129	534.521	8.7327	-9.0669	-1.4493	4.19852	-9.80018		ADJ	1.6129	534.521	0.226573	0.596553	0.0299979	0.381124	4.12078
AFJ	1.6129	453.694	13.2902	-1.41772	-7.54352	0.5067	6.95515		AFJ	1.6129	453.694	0.524775	0.0145852	0.812686	0.00555106	2.07551
ALB	1.6129	1089.25	22.4987	-18.0739	-7.63841	6.4128	3.51745		ALB	1.6129	1089.25	1.50393	2.37047	0.833259	0.88914	0.530844
AR	1.6129	833.062	20.1447	-16.7369	-5.54306	5.3113	-3.28371		AR	1.6129	833.062	1.20568	2.03273	0.438807	0.609924	0.462639
ARM	1.6129	262.172	13.0456	-6.06504	4.33299	1.33397	-1.51709		ARM	1.6129	262.172	0.505638	0.266931	0.268133	0.0384742	0.0987492
ASJ	1.6129	858.844	10.1096	3.0264	4.67302	-23.201	2.40569		ASJ	1.6129	858.844	0.303654	0.0664636	0.311867	11.6383	0.248308
AZB	1.6129	248.24	9.29795	-8.5853	2.26004	4.79138	-4.84311		AZB	1.6129	248.24	0.256854	0.534863	0.072947	0.49636	1.00637
BAL	1.6129	700.772	11.9403	-1.6828	4.7844	6.01977	-1.94371		BAL	1.6129	700.772	0.423587	0.0205493	0.326911	0.783492	0.162098
BED	1.6129	567.681	1.58006	20.9557	-0.47643	1.73999	-2.292		BED	1.6129	567.681	0.00741756	3.18665	0.0032417	0.0654587	0.225394
BH	1.6129	833.947	20.2314	-16.4771	-7.51602	4.5419	7.21605		BH	1.6129	833.947	1.21608	1.97011	0.806771	0.446016	2.23414
BUK	1.6129	1879.19	-32.4333	3.72206	21.6592	6.77137	12.6502		BUK	1.6129	1879.19	3.12531	0.100531	6.69978	0.991352	6.86599
BUL	1.6129	575.445	18.4416	-13.6246	-3.86419	4.34247	0.892739		BUL	1.6129	575.445	1.01043	1.34704	0.213251	0.407707	0.0341948
CAJ	1.6129	1634.9	-0.166027	7.08021	32.8318	12.8623	16.0096		CAJ	1.6129	1634.9	8.18975e-05	0.363768	15.3944	3.57693	10.997
CAR	1.6129	1681.88	15.7827	-7.72507	-7.17206	-24.0551	11.274		CAR	1.6129	1681.88	0.740074	0.433048	0.734619	12.5109	5.4534
CHE	1.6129	499.305	11.6166	-0.846457	4.38584	-5.80248	-12.3912		CHE	1.6129	499.305	0.400927	0.00519925	0.274714	0.727951	6.58776
CRE	1.6129	522.63	17.6638	-11.103	-4.22697	2.80296	-0.851168		CRE	1.6129	522.63	0.926997	0.894558	0.255172	0.169867	0.0310844
CT	1.6129	1399.03	-1.29915	11.7395	29.7202	-1.70966	-15.749		CT	1.6129	1399.03	0.00501451	1.00007	12.6148	0.0631968	10.6419
CYP	1.6129	478.188	12.6825	2.63252	-0.692428	-13.8812	-4.07776		CYP	1.6129	478.188	0.47788	0.050289	0.00684738	4.16608	0.713435
CZS	1.6129	545.078	11.3739	-3.17963	0.968243	-14.8023	1.65905		CZS	1.6129	545.078	0.38435	0.0733644	0.0133888	4.73731	0.118094
DUN	1.6129	4116.92	-60.7954	-8.961	-6.71347	-0.774571	-13.6733		DUN	1.6129	4116.92	10.9813	0.582699	0.643678	0.0129717	8.02154
DZ	1.6129	505.432	15.7795	-5.30247	-3.16301	-7.1589	4.38567		DZ	1.6129	505.432	0.739774	0.204027	0.142881	1.10807	0.825246
EGB	1.6129	508.879	7.94244	19.288	-4.5338	4.66239	-2.1923		EGB	1.6129	508.879	0.187421	2.69965	0.293562	0.469993	0.206211
ET	1.6129	4811.74	1.21766	62.2489	-26.6849	9.68141	1.6071		ET	1.6129	4811.74	0.00440516	28.1186	10.1696	2.02652	0.110814
GEO	1.6129	531.681	9.64167	-3.10582	4.46605	-6.23045	-15.6577		GEO	1.6129	531.681	0.276195	0.0699975	0.284854	0.839294	10.5189
GIL	1.6129	726.519	-1.92822	3.46641	22.9857	7.60419	2.70754		GIL	1.6129	726.519	0.0110464	0.0871949	7.54553	1.2502	0.31453
GRE	1.6129	608.806	18.3329	-14.0945	-5.40024	5.07685	0.776486		GRE	1.6129	608.806	0.998563	1.44156	0.416486	0.557266	0.0258689
GUR	1.6129	2365.32	7.84072	39.2839	-20.9973	12.5867	-2.51478		GUR	1.6129	2365.32	0.182652	11.1985	6.29653	3.42531	0.271339
HU	1.6129	587.157	17.7665	-12.9697	-4.81832	5.95425	-2.92096		HU	1.6129	587.157	0.937813	1.22064	0.331563	0.766528	0.36607
ICR	1.6129	453.385	14.6153	-11.3851	-2.66437	3.37372	2.74067		ICR	1.6129	453.385	0.634639	0.940599	0.101382	0.246089	0.322275
IRN	1.6129	147.591	0.893816	0.684182	7.98641	-1.53165	1.05159		IRN	1.6129	147.591	0.0023736	0.00339683	0.910915	0.0507215	0.0474464
IRQ	1.6129	345.134	7.12507	3.18898	5.3344	3.29658	4.29347		IRQ	1.6129	345.134	0.150831	0.0737963	0.406393	0.234964	0.790915
JOR	1.6129	407.568	10.6438	9.01621	-3.72555	4.27253	-1.65606		JOR	1.6129	407.568	0.336595	0.589901	0.198224	0.39468	0.117669
KAR	1.6129	2552.11	-48.2991	-1.84547	8.56382	2.7237	6.34607		KAR	1.6129	2552.11	6.93089	0.0247142	1.04739	0.160396	1.72791
KAZ	1.6129	2373.94	-46.9495	-3.40981	4.53648	1.69683	4.34607		KAZ	1.6129	2373.94	6.54898	0.0843705	0.293909	0.0622517	0.810412
KHO	1.6129	1430.65	-30.2733	2.55727	13.6003	-0.60404	6.44684		KHO	1.6129	1430.65	2.7229	0.0474554	2.64164	0.00788872	1.78322
KUR	1.6129	126.23	5.05296	-2.47842	3.16127	-4.82143	-1.09487		KUR	1.6129	126.23	0.0758582	0.044574	0.142724	0.502604	0.0514323
KYR	1.6129	4988.76	-66.2639	-11.5504	-16.891	-3.307	-3.82865		KYR	1.6129	4988.76	13.0457	0.968116	4.07459	0.236451	0.62893
LBK	1.6129	772.615	7.61611	3.60818	14.3234	-7.62144	-15.5367		LBK	1.6129	772.615	0.172337	0.0944731	2.92999	1.25588	10.3568
LUR	1.6129	507.374	1.02715	1.91821	9.15447	-2.1481	0.251814		LUR	1.6129	507.374	0.0031346	0.0267007	1.19685	0.0997667	0.00272063
MAC	1.6129	693.057	19.1884	-15.6738	-6.5115	5.35078	0.103976		MAC	1.6129	693.057	1.09393	1.7827	0.605531	0.619026	0.000463852
MCR	1.6129	819.646	20.3186	-16.5046	-7.77041	6.14915	2.89537		MCR	1.6129	819.646	1.22659	1.9767	0.862308	0.817532	0.359683
MZD	1.6129	730.47	6.06049	7.99865	14.5153	9.15939	-4.30646		MZD	1.6129	730.47	0.109126	0.464263	3.00904	1.81388	0.795706
NEJ	1.6129	344.554	3.91016	9.23986	11.5607	3.33003	-2.50372		NEJ	1.6129	344.554	0.0454256	0.61953	1.90872	0.239757	0.268957
OM	1.6129	565.336	2.39445	18.2642	-3.46476	-4.0515	4.24582		OM	1.6129	565.336	0.0170342	2.42066	0.171444	0.3549	0.773455
PAL	1.6129	152.758	7.031	8.15724	-1.40678	1.11801	-1.89697		PAL	1.6129	152.758	0.146874	0.482856	0.0282634	0.0270249	0.154395
PPNB	1.6129	2113.81	9.63134	11.9496	-2.78878	-40.7691	6.52378		PPNB	1.6129	2113.81	0.275604	1.03619	0.111072	35.9367	1.82604
QAT	1.6129	635.063	-2.56659	20.7181	0.242833	3.40252	3.34365		QAT	1.6129	635.063	0.0195715	3.1148	0.000842151	0.250309	0.479682
RO	1.6129	597.235	19.3837	-11.6813	-3.26214	2.27847	2.76849		RO	1.6129	597.235	1.11631	0.990173	0.151978	0.112244	0.328849
ROM	1.6129	975.103	-21.8523	-12.1161	-11.2639	1.53895	-1.55171		ROM	1.6129	975.103	1.41875	1.06526	1.81199	0.0512066	0.103307
SA	1.6129	711.928	1.82026	19.0072	1.8603	-0.641435	-0.824816		SA	1.6129	711.928	0.00984416	2.62161	0.0494244	0.0088957	0.0291895
SB	1.6129	706.293	19.2018	-15.052	-7.28839	4.75995	1.6579		SB	1.6129	706.293	1.09546	1.64406	0.758643	0.489869	0.117931
SJ	1.6129	587.661	17.1977	-11.6222	-3.63314	1.08459	1.1562		SJ	1.6129	587.661	0.878726	0.980179	0.188512	0.0254336	0.0573557
SLV	1.6129	995.796	22.1276	-17.7822	-9.09617	6.70214	3.62834		SLV	1.6129	995.796	1.45473	2.29457	1.18166	0.971185	0.564843
SYR	1.6129	206.58	6.33608	5.66551	5.05662	-0.836286	-7.19583		SYR	1.6129	206.58	0.119276	0.232922	0.36517	0.0151211	2.22164
SZE	1.6129	296.409	9.01906	-11.5705	-5.14135	2.60908	-0.895906		SZE	1.6129	296.409	0.241676	0.97148	0.37751	0.14718	0.0344379
TAJ	1.6129	1892.44	-41.5111	-2.37597	4.36907	-2.97462	0.676809		TAJ	1.6129	1892.44	5.11965	0.0409651	0.272617	0.191309	0.0196537
TK	1.6129	132.683	4.47063	-3.99447	1.31377	0.548921	-0.238427		TK	1.6129	132.683	0.0593811	0.115785	0.0246499	0.00651471	0.00243905
TKM	1.6129	1212.07	-32.65	-8.39262	-1.52648	3.69949	2.88437		TKM	1.6129	1212.07	3.16721	0.511125	0.033278	0.295909	0.356955
UAE	1.6129	337.884	-4.69228	10.9182	2.72755	-7.048	5.27431		UAE	1.6129	337.884	0.0654153	0.865039	0.106248	1.07401	1.19355
UIGH	1.6129	7611.86	-83.2105	-16.3827	-18.863	-1.99287	-1.30456		UIGH	1.6129	7611.86	20.5716	1.94762	5.08157	0.0858686	0.0730202
UZB	1.6129	1357.54	-34.5125	-9.36825	-4.65251	1.56711	1.54242		UZB	1.6129	1357.54	3.53887	0.636867	0.309136	0.0530971	0.102074
YE	1.6129	1516.44	-2.61591	35.8683	-12.9906	0.100038	2.30802		YE	1.6129	1516.44	0.0203309	9.33584	2.4101	0.000216374	0.228555
SQUARED COSINES OF ACTIVE CASES
Identifier	Relative Weight	Distance to origin	Axis 1	Axis 2	Axis 3	Axis 4	Axis 5
ADJ	1.6129	534.521	0.14267	0.153799	0.00392963	0.0329782	0.179681
AFJ	1.6129	453.694	0.389313	0.00443015	0.125425	0.000565899	0.106623
ALB	1.6129	1089.25	0.464716	0.299899	0.0535646	0.0377544	0.0113587
AR	1.6129	833.062	0.48713	0.336257	0.0368826	0.0338629	0.0129436
ARM	1.6129	262.172	0.649146	0.140308	0.0716127	0.00678749	0.00877882
ASJ	1.6129	858.844	0.119002	0.0106645	0.0254261	0.626758	0.00673852
AZB	1.6129	248.24	0.348259	0.29692	0.020576	0.0924806	0.094488
BAL	1.6129	700.772	0.203449	0.004041	0.0326646	0.051711	0.00539123
BED	1.6129	567.681	0.0043979	0.773568	0.000399847	0.00533321	0.00925394
BH	1.6129	833.947	0.49081	0.325552	0.0677387	0.0247364	0.0624396
BUK	1.6129	1879.19	0.559772	0.00737221	0.249641	0.0243996	0.0851573
BUL	1.6129	575.445	0.591007	0.322586	0.0259485	0.0327695	0.00138498
CAJ	1.6129	1634.9	1.68604e-05	0.0306621	0.659323	0.101192	0.156772
CAR	1.6129	1681.88	0.148105	0.0354821	0.0305839	0.344048	0.075572
CHE	1.6129	499.305	0.270264	0.00143497	0.0385248	0.0674314	0.307511
CRE	1.6129	522.63	0.596998	0.235875	0.0341872	0.0150328	0.00138623
CT	1.6129	1399.03	0.0012064	0.0985079	0.631362	0.00208927	0.177288
CYP	1.6129	478.188	0.336364	0.0144925	0.00100265	0.402953	0.0347731
CZS	1.6129	545.078	0.237332	0.0185479	0.00171993	0.401974	0.00504962
DUN	1.6129	4116.92	0.897778	0.0195048	0.0109477	0.00014573	0.0454123
DZ	1.6129	505.432	0.492634	0.0556281	0.0197942	0.101398	0.0380548
EGB	1.6129	508.879	0.123963	0.731074	0.0403935	0.0427172	0.00944463
ET	1.6129	4811.74	0.00030814	0.805306	0.147989	0.0194794	0.000536763
GEO	1.6129	531.681	0.174845	0.0181426	0.0375143	0.073011	0.461113
GIL	1.6129	726.519	0.00511757	0.0165391	0.727224	0.0795901	0.0100903
GRE	1.6129	608.806	0.552058	0.326304	0.0479013	0.0423359	0.000990347
GUR	1.6129	2365.32	0.0259909	0.652438	0.186396	0.0669784	0.00267369
HU	1.6129	587.157	0.537589	0.286486	0.0395401	0.0603808	0.0145311
ICR	1.6129	453.385	0.471138	0.285895	0.0156574	0.0251044	0.0165672
IRN	1.6129	147.591	0.00541299	0.00317164	0.43216	0.0158949	0.0074926
IRQ	1.6129	345.134	0.147093	0.0294656	0.0824488	0.0314876	0.0534109
JOR	1.6129	407.568	0.277969	0.199456	0.034055	0.0447888	0.006729
KAR	1.6129	2552.11	0.914067	0.00133449	0.0287366	0.00290683	0.0157801
KAZ	1.6129	2373.94	0.928523	0.00489767	0.00866898	0.00121285	0.00795654
KHO	1.6129	1430.65	0.640602	0.00457111	0.12929	0.000255035	0.029051
KUR	1.6129	126.23	0.202268	0.0486617	0.0791696	0.184157	0.00949644
KYR	1.6129	4988.76	0.88016	0.0267426	0.0571895	0.00219217	0.00293831
LBK	1.6129	772.615	0.0750763	0.0168505	0.265539	0.0751814	0.312429
LUR	1.6129	507.374	0.00207942	0.00725208	0.165173	0.00909458	0.000124977
MAC	1.6129	693.057	0.531263	0.354468	0.0611777	0.0413109	1.55991e-05
MCR	1.6129	819.646	0.503686	0.33234	0.073665	0.0461322	0.0102278
MZD	1.6129	730.47	0.050282	0.0875851	0.288437	0.11485	0.0253886
NEJ	1.6129	344.554	0.0443744	0.247785	0.387893	0.0321839	0.0181934
OM	1.6129	565.336	0.0101415	0.590059	0.0212344	0.0290352	0.0318872
PAL	1.6129	152.758	0.323616	0.435594	0.0129552	0.0081825	0.0235569
PPNB	1.6129	2113.81	0.0438842	0.0675527	0.00367929	0.786317	0.0201341
QAT	1.6129	635.063	0.0103728	0.6759	9.28537e-05	0.0182299	0.0176046
RO	1.6129	597.235	0.629113	0.228473	0.0178181	0.00869246	0.0128333
ROM	1.6129	975.103	0.489715	0.150548	0.130116	0.00242885	0.00246927
SA	1.6129	711.928	0.00465405	0.507459	0.00486106	0.000577922	0.000955604
SB	1.6129	706.293	0.522036	0.320777	0.0752105	0.032079	0.00389162
SJ	1.6129	587.661	0.503287	0.229852	0.0224615	0.00200174	0.00227477
SLV	1.6129	995.796	0.491699	0.317541	0.0830896	0.0451083	0.0132204
SYR	1.6129	206.58	0.194336	0.155379	0.123775	0.0033855	0.250654
SZE	1.6129	296.409	0.27443	0.45166	0.089179	0.0229659	0.00270791
TAJ	1.6129	1892.44	0.910559	0.00298306	0.0100869	0.00467564	0.000242053
TK	1.6129	132.683	0.150634	0.120255	0.0130084	0.00227094	0.000428445
TKM	1.6129	1212.07	0.879502	0.0581121	0.00192244	0.0112916	0.00686392
UAE	1.6129	337.884	0.0651629	0.352807	0.022018	0.147016	0.0823309
UIGH	1.6129	7611.86	0.909633	0.0352599	0.0467447	0.000521758	0.000223584
UZB	1.6129	1357.54	0.877405	0.0646493	0.0159449	0.00180902	0.00175247
YE	1.6129	1516.44	0.00451254	0.848395	0.111285	6.59943e-06	0.00351281

## Sheet: HC-Sheet 1
CHARACTERISATION BY CONTINUOUS VARIABLES OF PARTITION
CUT "a" OF THE TREE INTO 6 CLUSTERS
Variable label	Fisher	Degrees of freedom	Test-value	Probability
AS	252.213	56	12.6564	5.1531e-37
H	50.3627	56	8.95624	1.67971e-19
AF	42.7542	56	8.54536	6.40688e-18
K	34.5673	56	8.00531	5.9582e-16
U5	9.79355	56	4.77415	9.02335e-07
HV0	7.54042	56	4.13534	1.77214e-05
HV	7.17157	56	4.01535	2.96787e-05
J	6.50403	56	3.78422	7.7095e-05
T	3.84382	56	2.60771	0.00455752
N*	3.39145	56	2.34611	0.0094853
N1	3.15561	56	2.19892	0.0139418
U7	2.39412	56	1.65828	0.0486306
U3	2.36319	56	1.63374	0.0511567
U1	2.15948	56	1.46586	0.0713436
U6	1.88622	56	1.22124	0.110998
R0	1.72702	56	1.0665	0.143099
U4	1.10867	56	0.342729	0.365901
U2	0.802042	56	-0.132587	0.55274
R+	0.743214	56	-0.238376	0.594205
X	0.720615	56	-0.280632	0.610504
U+	0.622259	56	-0.476645	0.683192
W	0.594902	56	-0.53515	0.703727
U*	0.466117	56	-0.840589	0.799711
I	0.37028	56	-1.11131	0.866783
N2	0.340572	56	-1.20577	0.886047

## Sheet: HC-Sheet 2
CHARACTERISATION BY CONTINUOUS VARIABLES OF CLUSTERS OF CUT "b" OF THE TREE INTO 6 CLUSTERS
Cluster	Weight	Count	Populations	Cluster representatives (Distance to cluster's center)	Characteristic variables	Cluster mean	Overall mean	Cluster Std. deviation	Overall Std. deviation	Test-value	Probability
1	20	20	ADJ,AFJ,ALB,AR,ARM,AZB, BH,BUL,CRE,DZ,GRE,HU,ICR,MAC,MCR,RO,SB,SJ,SLV,SZE	BUL (9,59211)	H	39.4137	21.6393	5.97419	14.687	6.52256	3.45587e-11
				SJ (10,63430)	HV0	4.01596	1.73198	2.86734	2.53614	4.85374	6.05776e-07
				CRE (15,16640)	U5	6.40735	3.24298	3.15451	3.51857	4.84703	6.26605e-07
					U4	2.89744	2.08203	1.57079	2.49122	1.76409	0.0388586
					U7	0.398176	1.13411	0.387345	2.03415	-1.94991	0.0255937
					AF	0.788653	5.62926	2.04581	12.368	-2.10938	0.0174559
					R0	1.71321	3.64002	1.56647	4.6854	-2.21639	0.0133324
					AS	1.69404	11.055	2.02715	20.5632	-2.45351	0.00707349
					HV	2.55203	6.46424	2.19305	8.25209	-2.55513	0.00530736
2	5	5	ASJ,CAR,CYP,CZS,PPNB	ASJ(40,32810)	K	28.8865	6.94459	7.92434	7.79313	6.51291	3.68545e-11
				CZS(122,04200)	N*	7.58242	0.965732	11.9189	4.10668	3.72702	9.68774e-05
				CYP(152,27000)
					T	3.50601	8.80828	3.31988	5.86075	-2.09277	0.018185
3	23	23	BAL,BED,CAJ,CHE,CT,EGB, GEO,GIL,IRN,IRQ,JOR,KUR, LBK,LUR,MZD,NEJ,OM,PAL, QAT,SA,SYR,TK,UAE	SYR(41,99430)	J	12.6188	8.79515	6.37669	5.56708	4.11958	1.89782e-05
				NEJ(52,38910)	U7	2.202	1.13411	2.78686	2.03415	3.14877	0.000819792
				LUR(66,13080)	U3	4.30837	2.48571	4.43582	3.61595	3.02328	0.00125024
					T	11.6058	8.80828	6.61855	5.86075	2.86302	0.00209813
					N1	4.08586	2.71837	3.96307	3.36974	2.43402	0.00746617
					R0	5.38152	3.64002	5.37855	4.6854	2.22933	0.0128958
					R+	1.27434	0.751927	2.07014	1.85454	1.68957	0.0455553
					H	16.1161	21.6393	6.31268	14.687	-2.25554	0.0120498
					AS	3.21998	11.055	2.9167	20.5632	-2.28533	0.0111467
					HV0	0.445796	1.73198	1.06493	2.53614	-3.04176	0.00117598
					U5	1.29116	3.24298	1.60745	3.51857	-3.32714	0.000438709
4	3	3	ET,GUR,YE	GUR(178,74100)	AF	52.6824	5.62926	12.5837	12.368	6.7002	1.04071e-11
				YEM(272,24000)	U6	1.18967	0.327197	1.27808	0.719503	2.11113	0.0173807
				ET(333,49800)	N1	6.19595	2.71837	2.09235	3.36974	1.81752	0.0345688
					H	7.09051	21.6393	5.66932	14.687	-1.74459	0.0405282
5	8	8	BUK,KAR,KAZ,KHO,ROM,TAJ,TKM,UZB	TAJ (87,86330)	AS	41.1721	11.055	7.5758	20.5632	4.40286	5.34165e-06
				TKM (90,07270)	HV	17.8839	6.46424	10.0439	8.25209	4.1601	1.59052e-05
				KAZ(121,28200)	U1	3.78492	2.20471	4.11511	2.56656	1.85086	0.0320945
					U3	0.446026	2.48571	0.777268	3.61595	-1.69572	0.0449692
					T	5.21292	8.80828	0.522395	5.86075	-1.84418	0.0325788
					N1	0.549501	2.71837	1.09445	3.36974	-1.93486	0.0265036
					K	1.66111	6.94459	2.04133	7.79313	-2.03808	0.0207709
					H	6.31241	21.6393	8.36886	14.687	-3.13714	0.000853023
6	3	3	DUN,KYR,UIGH	KYR (36,37440)	AS	79.1667	11.055	10.623	20.5632	5.83352	2.71348e-09
				DUN (212,57400)
				UIGH (236,07300)	H	0	21.6393	0	14.687	-2.59484	0.0047318
					J	0	8.79515	0	5.56708	-2.78237	0.00269815

## Sheet: HC-Sheet 3
CONTINUOUS VARIABLES STATISTICS BY CLUSTERS
H
Clusters	Count	Mean	Std Deviation	Minimum	Maximum
CLUSTER 1 / 6	20	39.4137	5.97419	29.8851	50
CLUSTER 2 / 6	5	22.1839	5.40346	14.2857	30.7692
CLUSTER 3 / 6	23	16.1161	6.31268	0	25
CLUSTER 4 / 6	3	7.09051	5.66932	1.11111	14.7059
CLUSTER 5 / 6	8	6.31241	8.36886	0	21.229
CLUSTER 6 / 6	3	0	0	0	0
Overall	62	21.6393	14.687	0	50
HV
Clusters	Count	Mean	Std Deviation	Minimum	Maximum
CLUSTER 1 / 6	20	2.55203	2.19305	0	7.32984
CLUSTER 2 / 6	5	1.15756	2.31511	0	5.78778
CLUSTER 3 / 6	23	8.04123	8.38047	0	36.3636
CLUSTER 4 / 6	3	1.14478	0.908467	0	2.22222
CLUSTER 5 / 6	8	17.8839	10.0439	0.27933	35
CLUSTER 6 / 6	3	4.16667	2.94628	0	6.25
Overall	62	6.46424	8.25209	0	36.3636
I
Clusters	Count	Mean	Std Deviation	Minimum	Maximum
CLUSTER 1 / 6	20	1.76111	1.10895	0	3.5524
CLUSTER 2 / 6	5	1.31424	1.39772	0	3.79747
CLUSTER 3 / 6	23	1.8227	1.58482	0	5
CLUSTER 4 / 6	3	2.1628	2.64173	0	5.88235
CLUSTER 5 / 6	8	1.04399	1.8546	0	5
CLUSTER 6 / 6	3	1.66667	2.35702	0	5
Overall	62	1.67026	1.61869	0	5.88235
J
Clusters	Count	Mean	Std Deviation	Minimum	Maximum
CLUSTER 1 / 6	20	7.89779	2.11232	4	13.3333
CLUSTER 2 / 6	5	5.47875	5.01849	0	13.1868
CLUSTER 3 / 6	23	12.6188	6.37669	3.125	29.5455
CLUSTER 4 / 6	3	6.21443	3.70505	1.85185	10.9091
CLUSTER 5 / 6	8	6.38411	1.73311	5	10
CLUSTER 6 / 6	3	0	0	0	0
Overall	62	8.79515	5.56708	0	29.5455
K
Clusters	Count	Mean	Std Deviation	Minimum	Maximum
CLUSTER 1 / 6	20	5.82029	2.80791	2	16.1504
CLUSTER 2 / 6	5	28.8865	7.92434	22.7848	42.8571
CLUSTER 3 / 6	23	6.34197	4.0048	0	15.5556
CLUSTER 4 / 6	3	3.52413	3.9825	0	9.09091
CLUSTER 5 / 6	8	1.66111	2.04133	0	5
CLUSTER 6 / 6	3	0	0	0	0
Overall	62	6.94459	7.79313	0	42.8571
T
Clusters	Count	Mean	Std Deviation	Minimum	Maximum
CLUSTER 1 / 6	20	9.5569	3.70912	2.18447	16.5714
CLUSTER 2 / 6	5	3.50601	3.31988	0	8.86076
CLUSTER 3 / 6	23	11.6058	6.61855	1.90476	30
CLUSTER 4 / 6	3	3.35248	1.92641	1.21212	5.88235
CLUSTER 5 / 6	8	5.21292	0.522395	4.83871	6.55738
CLUSTER 6 / 6	3	6.25	8.83883	0	18.75
Overall	62	8.80828	5.86075	0	30
U*
Clusters	Count	Mean	Std Deviation	Minimum	Maximum
CLUSTER 1 / 6	20	0.961599	1.34441	0	5.65371
CLUSTER 2 / 6	5	1.42857	2.85714	0	7.14286
CLUSTER 3 / 6	23	1.25733	3.47632	0	15.0327
CLUSTER 4 / 6	3	0.20202	0.2857	0	0.606061
CLUSTER 5 / 6	8	0	0	0	0
CLUSTER 6 / 6	3	0	0	0	0
Overall	62	0.901604	2.4427	0	15.0327
U1
Clusters	Count	Mean	Std Deviation	Minimum	Maximum
CLUSTER 1 / 6	20	1.73425	1.73852	0	6
CLUSTER 2 / 6	5	0.634947	0.980511	0	2.53165
CLUSTER 3 / 6	23	2.85906	2.45173	0	10
CLUSTER 4 / 6	3	0.931538	1.06628	0	2.42424
CLUSTER 5 / 6	8	3.78492	4.11511	0	10
CLUSTER 6 / 6	3	0	0	0	0
Overall	62	2.20471	2.56656	0	10
U2
Clusters	Count	Mean	Std Deviation	Minimum	Maximum
CLUSTER 1 / 6	20	1.23176	1.25051	0	5.68384
CLUSTER 2 / 6	5	0.393979	0.639431	0	1.64835
CLUSTER 3 / 6	23	1.92453	2.73103	0	10.1124
CLUSTER 4 / 6	3	1.66105	1.85018	0	4.24242
CLUSTER 5 / 6	8	2.4212	3.25269	0	10
CLUSTER 6 / 6	3	3.33333	4.71405	0	10
Overall	62	1.69713	2.51667	0	10.1124
U3
Clusters	Count	Mean	Std Deviation	Minimum	Maximum
CLUSTER 1 / 6	20	1.96797	2.99364	0	14
CLUSTER 2 / 6	5	1.44002	2.45335	0	6.32911
CLUSTER 3 / 6	23	4.30837	4.43582	0	17.6471
CLUSTER 4 / 6	3	1.63135	0.945971	0.740741	2.94118
CLUSTER 5 / 6	8	0.446026	0.777268	0	1.95531
CLUSTER 6 / 6	3	0	0	0	0
Overall	62	2.48571	3.61595	0	17.6471
U4
Clusters	Count	Mean	Std Deviation	Minimum	Maximum
CLUSTER 1 / 6	20	2.89744	1.57079	0	5.76923
CLUSTER 2 / 6	5	0.900308	1.01754	0	2.53165
CLUSTER 3 / 6	23	1.86016	2.83784	0	11.1111
CLUSTER 4 / 6	3	2.36482	2.53602	0	5.88235
CLUSTER 5 / 6	8	2.09467	3.37412	0	10
CLUSTER 6 / 6	3	0	0	0	0
Overall	62	2.08203	2.49122	0	11.1111
U5
Clusters	Count	Mean	Std Deviation	Minimum	Maximum
CLUSTER 1 / 6	20	6.40735	3.15451	0.663717	11.26
CLUSTER 2 / 6	5	4.25319	3.39069	0	8.79121
CLUSTER 3 / 6	23	1.29116	1.60745	0	6.25
CLUSTER 4 / 6	3	0	0	0	0
CLUSTER 5 / 6	8	2.74441	3.41996	0	10
CLUSTER 6 / 6	3	0	0	0	0
Overall	62	3.24298	3.51857	0	11.26
U6
Clusters	Count	Mean	Std Deviation	Minimum	Maximum
CLUSTER 1 / 6	20	0.169316	0.372008	0	1.17647
CLUSTER 2 / 6	5	0.602792	0.982351	0	2.53165
CLUSTER 3 / 6	23	0.448562	0.806948	0	2.94118
CLUSTER 4 / 6	3	1.18967	1.27808	0	2.96296
CLUSTER 5 / 6	8	0	0	0	0
CLUSTER 6 / 6	3	0	0	0	0
Overall	62	0.327197	0.719503	0	2.96296
U7
Clusters	Count	Mean	Std Deviation	Minimum	Maximum
CLUSTER 1 / 6	20	0.398176	0.387345	0	1.14943
CLUSTER 2 / 6	5	0.574708	0.712126	0	1.60772
CLUSTER 3 / 6	23	2.202	2.78686	0	10.8108
CLUSTER 4 / 6	3	0.20202	0.2857	0	0.606061
CLUSTER 5 / 6	8	1.02823	1.83534	0	5
CLUSTER 6 / 6	3	0	0	0	0
Overall	62	1.13411	2.03415	0	10.8108
U+
Clusters	Count	Mean	Std Deviation	Minimum	Maximum
CLUSTER 1 / 6	20	0.33296	0.759614	0	3.37079
CLUSTER 2 / 6	5	0.581605	1.08461	0	2.74725
CLUSTER 3 / 6	23	0.442698	0.804628	0	2.7027
CLUSTER 4 / 6	3	0.325477	0.249451	0	0.606061
CLUSTER 5 / 6	8	0	0	0	0
CLUSTER 6 / 6	3	0	0	0	0
Overall	62	0.334286	0.743849	0	3.37079
HV0
Clusters	Count	Mean	Std Deviation	Minimum	Maximum
CLUSTER 1 / 6	20	4.01596	2.86734	0	13.3333
CLUSTER 2 / 6	5	1.08265	1.36446	0	3.21543
CLUSTER 3 / 6	23	0.445796	1.06493	0	4.44444
CLUSTER 4 / 6	3	0	0	0	0
CLUSTER 5 / 6	8	0.799581	1.65212	0	5
CLUSTER 6 / 6	3	1.66667	2.35702	0	5
Overall	62	1.73198	2.53614	0	13.3333
W
Clusters	Count	Mean	Std Deviation	Minimum	Maximum
CLUSTER 1 / 6	20	2.52574	1.58276	0	5.86146
CLUSTER 2 / 6	5	2.6195	2.89373	0	7.69231
CLUSTER 3 / 6	23	2.48195	2.77156	0	9.52381
CLUSTER 4 / 6	3	0.37037	0.523783	0	1.11111
CLUSTER 5 / 6	8	1.48653	3.25963	0	10
CLUSTER 6 / 6	3	1.66667	2.35702	0	5
Overall	62	2.23711	2.51079	0	10
X
Clusters	Count	Mean	Std Deviation	Minimum	Maximum
CLUSTER 1 / 6	20	3.42797	3.75022	0	15.0485
CLUSTER 2 / 6	5	2.88486	2.69635	0	7.69231
CLUSTER 3 / 6	23	2.26625	3.12809	0	15
CLUSTER 4 / 6	3	0.650954	0.498902	0	1.21212
CLUSTER 5 / 6	8	2.19514	5.21586	0	15.9218
CLUSTER 6 / 6	3	0	0	0	0
Overall	62	2.49389	3.61459	0	15.9218
AF
Clusters	Count	Mean	Std Deviation	Minimum	Maximum
CLUSTER 1 / 6	20	0.788653	2.04581	0	8.98058
CLUSTER 2 / 6	5	3.20886	3.0401	0	7.14286
CLUSTER 3 / 6	23	6.88313	7.69853	0	23.9316
CLUSTER 4 / 6	3	52.6824	12.5837	38.7879	69.2593
CLUSTER 5 / 6	8	0.104749	0.277139	0	0.837989
CLUSTER 6 / 6	3	0	0	0	0
Overall	62	5.62926	12.368	0	69.2593
N1
Clusters	Count	Mean	Std Deviation	Minimum	Maximum
CLUSTER 1 / 6	20	1.84111	2.22965	0	9.52381
CLUSTER 2 / 6	5	2.95166	3.63001	0	9.6463
CLUSTER 3 / 6	23	4.08586	3.96307	0	15.5556
CLUSTER 4 / 6	3	6.19595	2.09235	3.7037	8.82353
CLUSTER 5 / 6	8	0.549501	1.09445	0	3.27869
CLUSTER 6 / 6	3	0	0	0	0
Overall	62	2.71837	3.36974	0	15.5556
N2
Clusters	Count	Mean	Std Deviation	Minimum	Maximum
CLUSTER 1 / 6	20	0.0438797	0.132463	0	0.485437
CLUSTER 2 / 6	5	0	0	0	0
CLUSTER 3 / 6	23	0.0830435	0.295612	0	1.37
CLUSTER 4 / 6	3	0	0	0	0
CLUSTER 5 / 6	8	0	0	0	0
CLUSTER 6 / 6	3	0	0	0	0
Overall	62	0.0449612	0.19808	0	1.37
N*
Clusters	Count	Mean	Std Deviation	Minimum	Maximum
CLUSTER 1 / 6	20	0.169039	0.494362	0	2.12014
CLUSTER 2 / 6	5	7.58242	11.9189	0	30.7692
CLUSTER 3 / 6	23	0.73666	1.92296	0	9.16031
CLUSTER 4 / 6	3	0	0	0	0
CLUSTER 5 / 6	8	0.204918	0.542162	0	1.63934
CLUSTER 6 / 6	3	0	0	0	0
Overall	62	0.965732	4.10668	0	30.7692
R0
Clusters	Count	Mean	Std Deviation	Minimum	Maximum
CLUSTER 1 / 6	20	1.71321	1.56647	0	5.71429
CLUSTER 2 / 6	5	5.16201	8.19926	0	21.4286
CLUSTER 3 / 6	23	5.38152	5.37855	0	18.6667
CLUSTER 4 / 6	3	5.27497	4.23559	0	10.3704
CLUSTER 5 / 6	8	2.46959	2.47005	0	5
CLUSTER 6 / 6	3	2.08333	2.94628	0	6.25
Overall	62	3.64002	4.6854	0	21.4286
R+
Clusters	Count	Mean	Std Deviation	Minimum	Maximum
CLUSTER 1 / 6	20	0.678293	2.18282	0	10
CLUSTER 2 / 6	5	0.506329	1.01266	0	2.53165
CLUSTER 3 / 6	23	1.27434	2.07014	0	9.52381
CLUSTER 4 / 6	3	0.40404	0.571399	0	1.21212
CLUSTER 5 / 6	8	0	0	0	0
CLUSTER 6 / 6	3	0	0	0	0
Overall	62	0.751927	1.85454	0	10
AS
Clusters	Count	Mean	Std Deviation	Minimum	Maximum
CLUSTER 1 / 6	20	1.69404	2.02715	0	7.86517
CLUSTER 2 / 6	5	0.664641	0.881831	0	2.1978
CLUSTER 3 / 6	23	3.21998	2.9167	0	9.92366
CLUSTER 4 / 6	3	2.42424	3.4284	0	7.27273
CLUSTER 5 / 6	8	41.1721	7.5758	30	50
CLUSTER 6 / 6	3	79.1667	10.623	68.75	93.75
Overall	62	11.055	20.5632	0	93.75

## Sheet: HC-Sheet 4
INERTIA DECOMPOSITION COMPUTED ON 6 AXES
Inertias	Inertias before	Inertias after	Counts before	Count after	Weights before	Weights after	Distances before	Distances after
Between-clusters	815.195	815.195
Within cluster
Cluster 1 / 6	24.9259	24.9259	20	20	20	20	466.71	466.71
Cluster 2 / 6	15.6787	15.6787	5	5	5	5	705.076	705.076
Cluster 3 / 6	111.492	111.492	23	23	23	23	132.852	132.852
Cluster 4 / 6	11.669	11.669	3	3	3	3	2602.72	2602.72
Cluster 5 / 6	31.1071	31.1071	8	8	8	8	1360.48	1360.48
Cluster 6 / 6	7.82293	7.82293	3	3	3	3	5311.64	5311.64
Total	1017.89	1017.89
Quotient (I. inter / I. total)	0.800867	0.800867
